# Supplementary material
Source: PubMed Central journal article supplement (PMC5657469)
Supplement: NIHMS73770-supplement-Supplementary_figures.pdf [file NIHMS73770-supplement-Supplementary_figures.pdf]

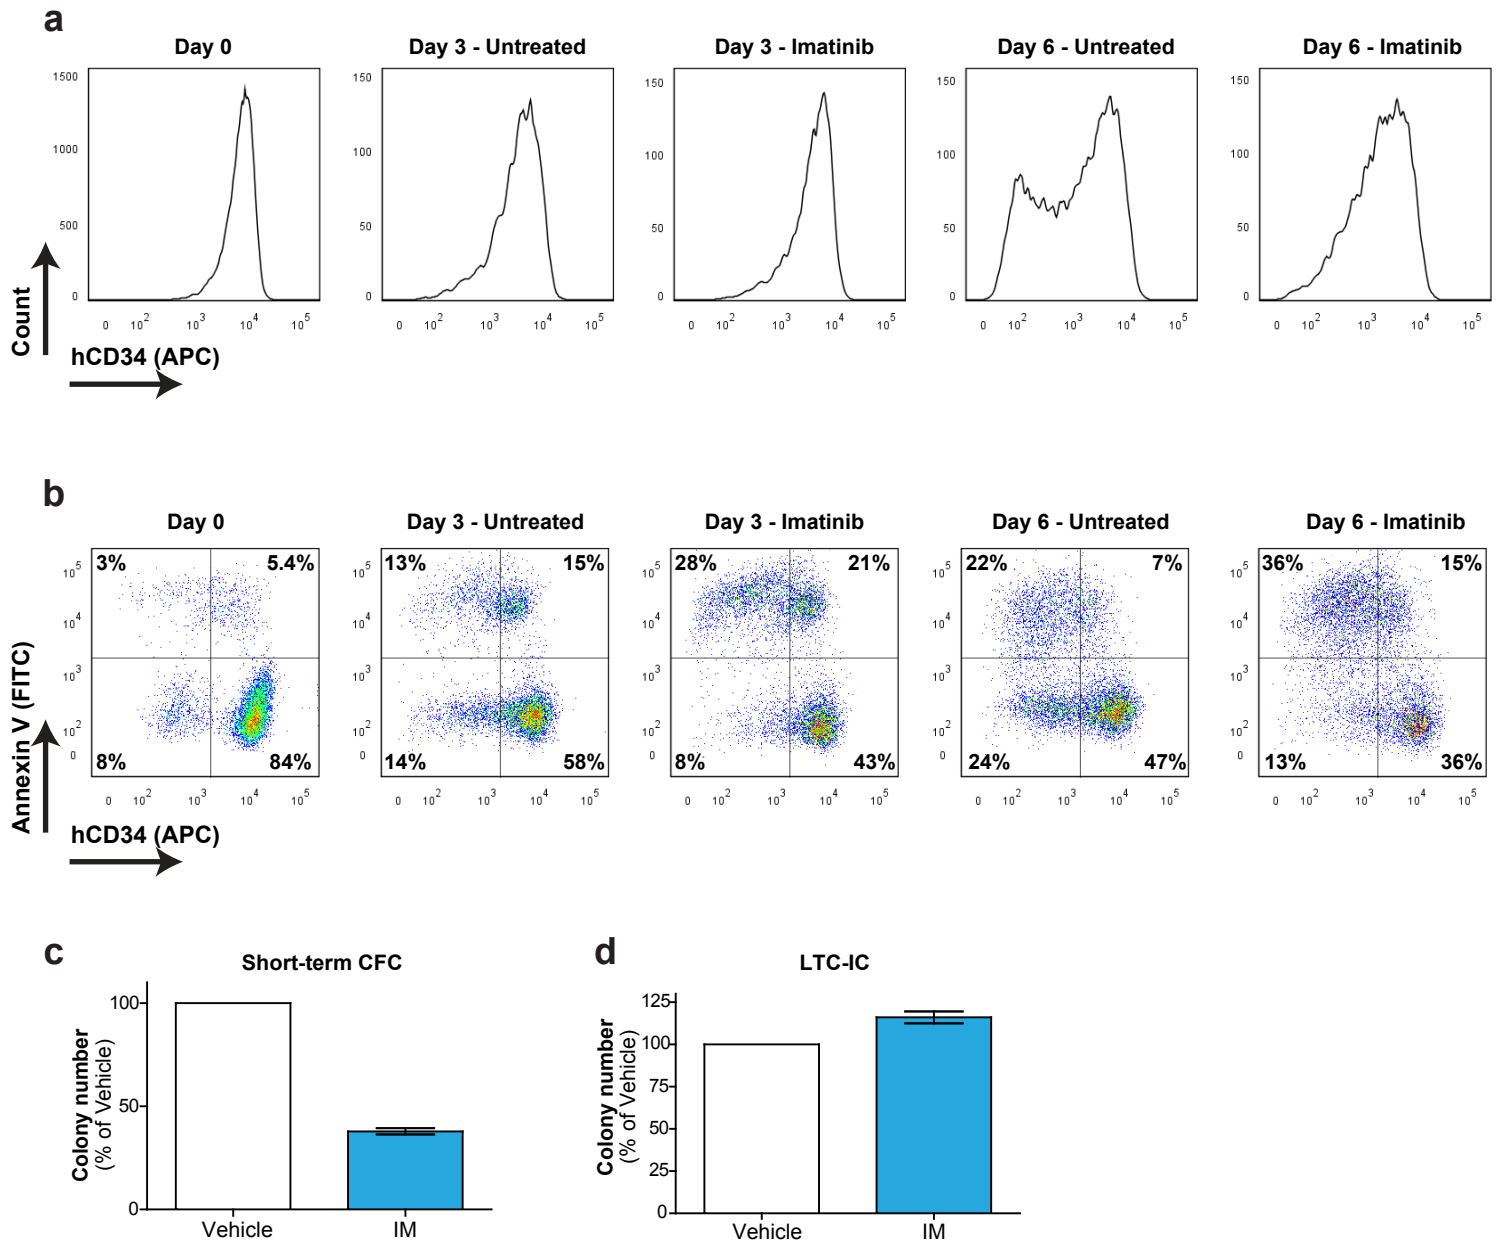

**Supplementary Figure 1: Imatinib fails to eliminate LSCs.**

(a) CD34 expression following *in vitro* culture of CD34<sup>+</sup> CML cells with imatinib (2  $\mu$ M). (b) CD34 expression and cell death following *in vitro* culture of CD34<sup>+</sup> CML cells with imatinib (2  $\mu$ M). (c) Number of colonies measured by CFC assay following 72 hours (h) drug treatment of CD34<sup>+</sup> CML cells with imatinib (2  $\mu$ M). Mean  $\pm$  S.E.M. n=4 patient samples. (d) Number of colonies measured by LTC-IC assay following single drug treatment of CD34<sup>+</sup> CML cells with imatinib (2  $\mu$ M). Mean  $\pm$  S.E.M. n=3 patient samples.

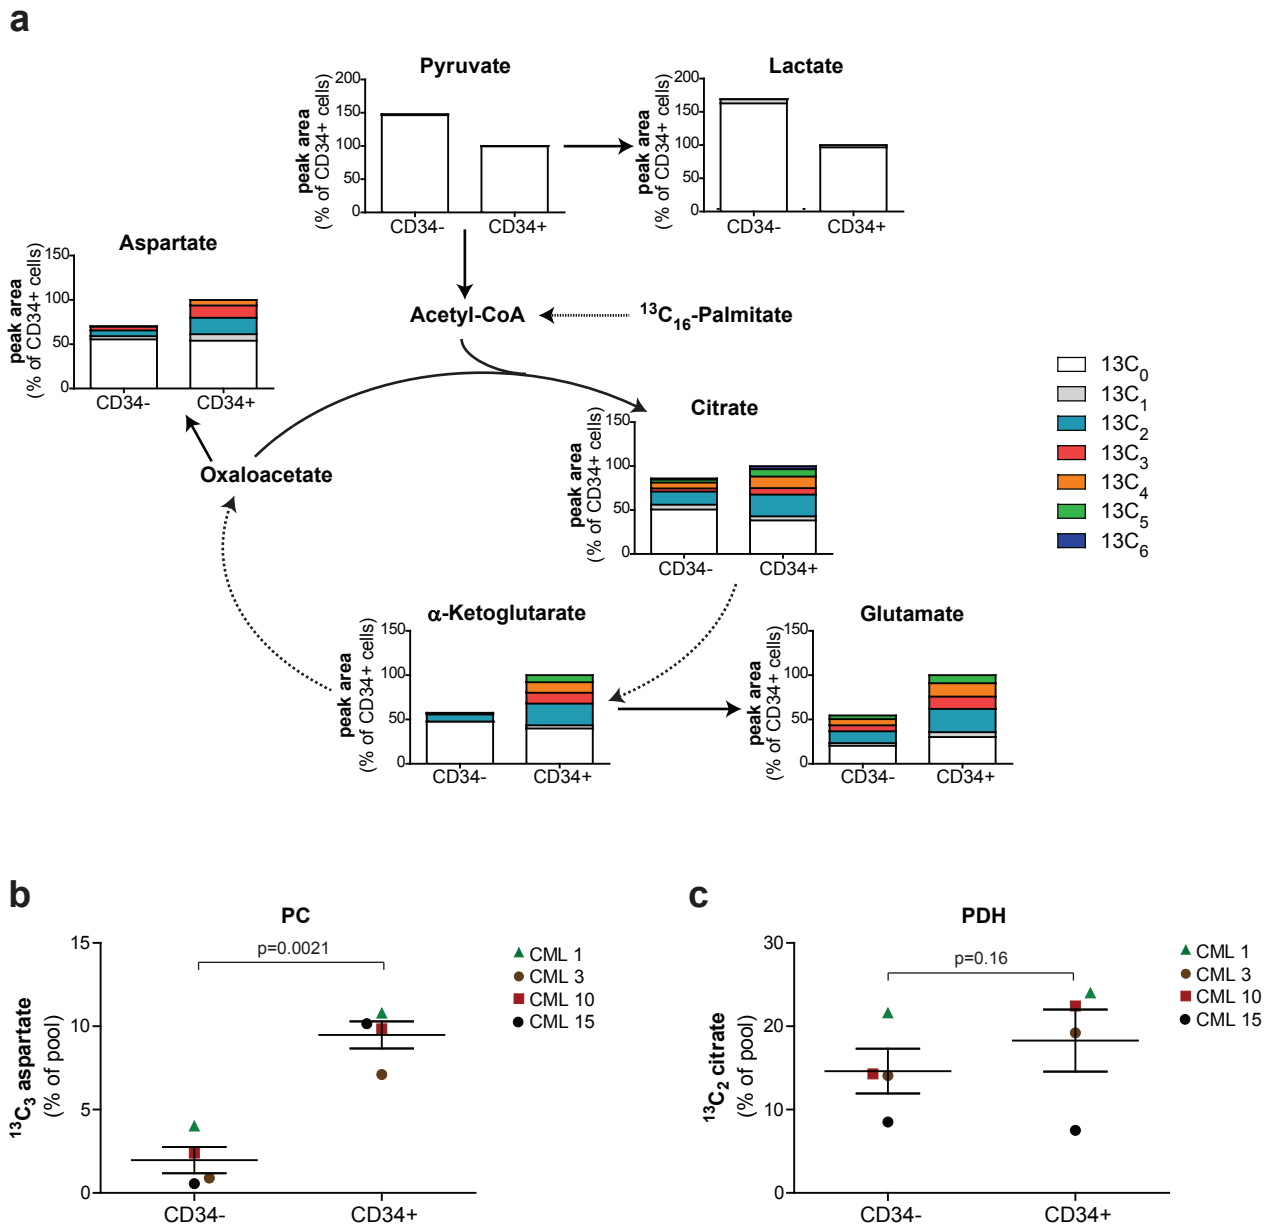

**Supplementary Figure 2: Enhanced fatty acid oxidation in primitive CML cells compared to differentiated CML cells.**

(a) Relative isotopologue distribution of indicated metabolites in CD34<sup>-</sup> and CD34<sup>+</sup> CML cells measured by LC-MS following 24 h incubation with <sup>13</sup>C<sub>16</sub>-labeled palmitate. n=1 patient sample. (b-c) Relative abundance of (b) <sup>13</sup>C<sub>3</sub>-aspartate and (c) <sup>13</sup>C<sub>2</sub>-citrate in CD34<sup>-</sup> and CD34<sup>+</sup> CML cells following 24 h incubation with <sup>13</sup>C<sub>6</sub>-labeled glucose. Mean ± S.E.M. n=4 patient samples. P-values were calculated by paired Student's t-test.



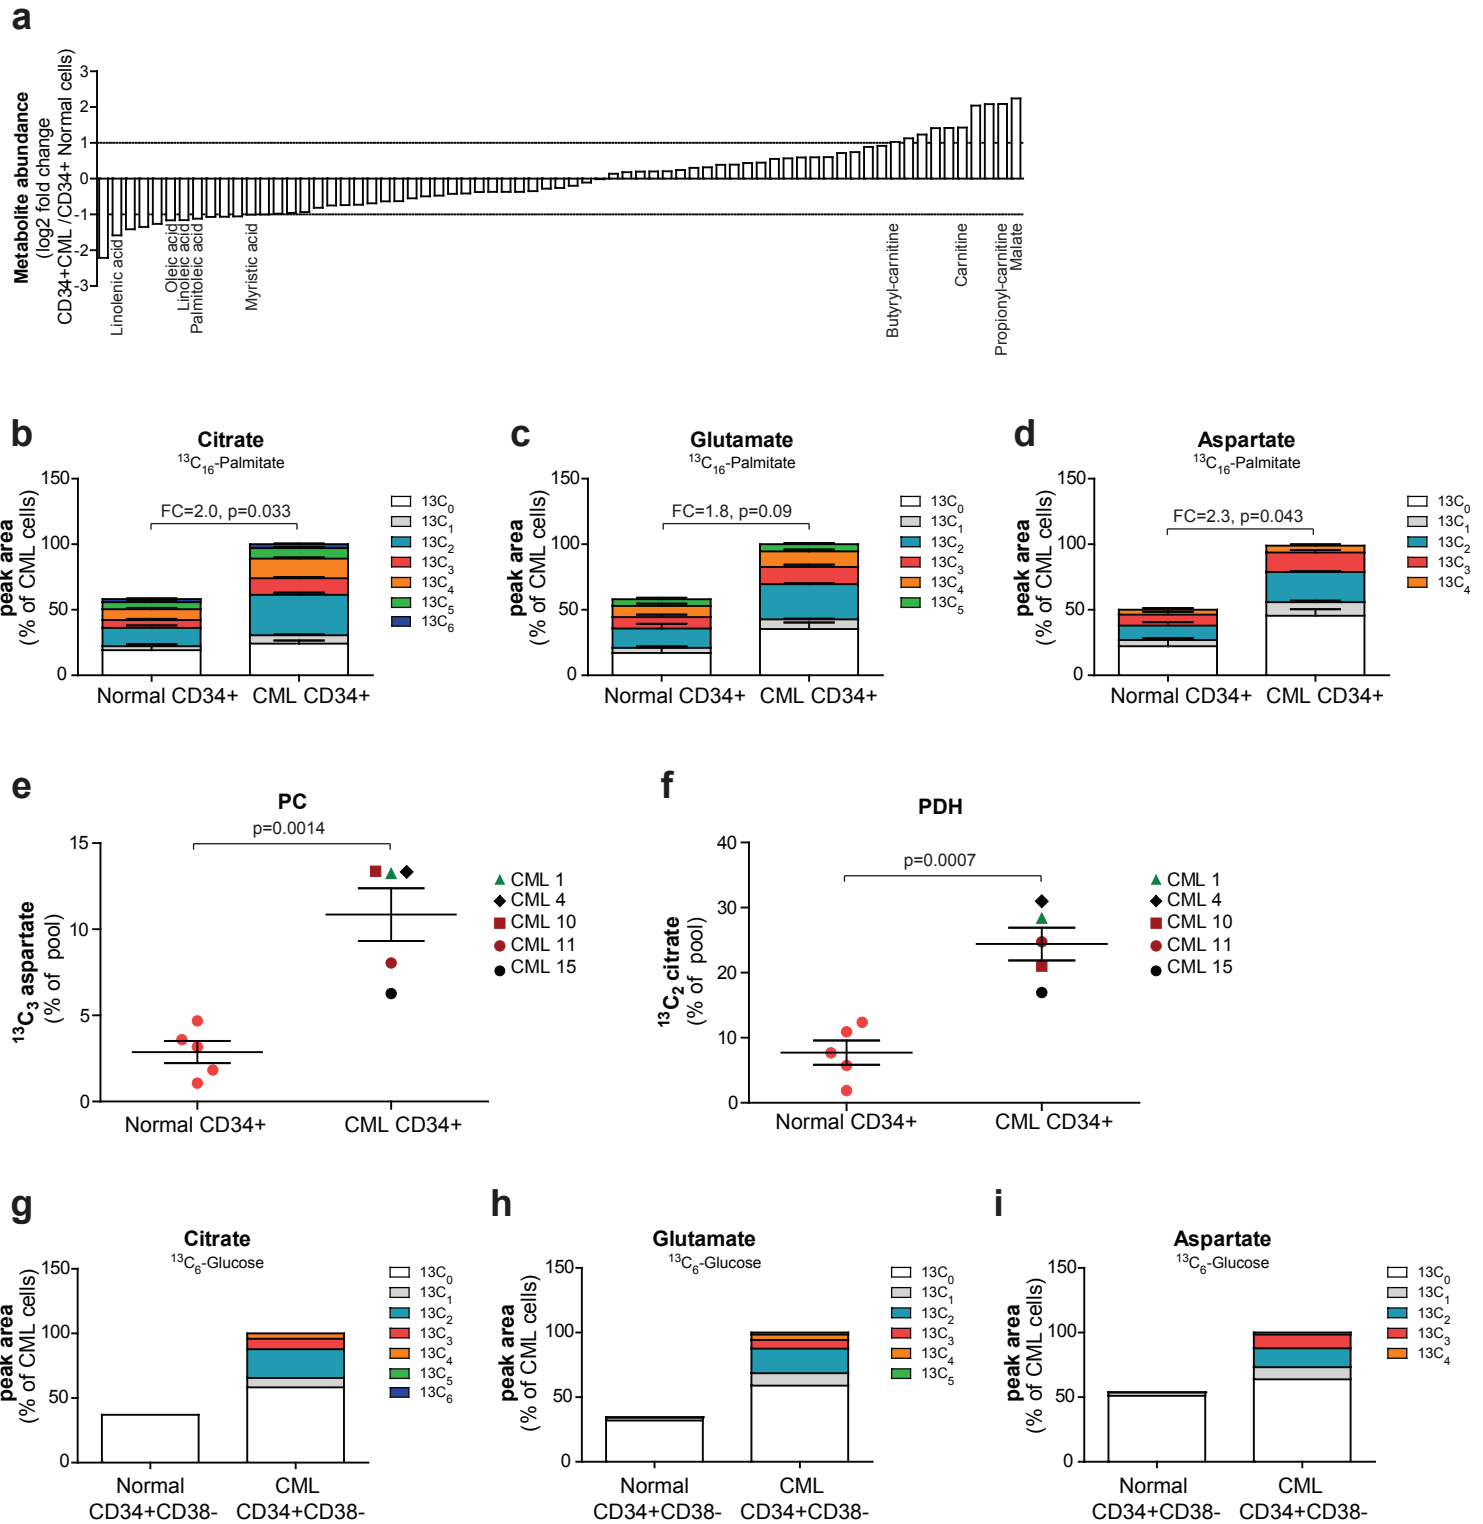

### Supplementary Figure 3: Enhanced mitochondrial metabolic activity in primitive CML cells compared to normal undifferentiated hematopoietic cells.

(a) Comparative steady-state metabolomics analysis of CD34<sup>+</sup> CML and CD34<sup>+</sup> normal cells measured by LC-MS. n=4 patient samples. (b-d) Relative isotopologue distribution of (b) citrate, (c) glutamate and (d) aspartate in CD34<sup>+</sup> CML and CD34<sup>+</sup> normal cells measured by LC-MS following 24 h incubation with <sup>13</sup>C<sub>16</sub>-labeled palmitate. Mean ± S.E.M. n=3 patient and normal samples. FC, Fold change of palmitate-derived (<sup>13</sup>C<sub>≥2</sub>) metabolite abundance relative to CD34<sup>+</sup> normal cells. (e-f) Relative abundance (e) <sup>13</sup>C<sub>3</sub>-aspartate and (f) <sup>13</sup>C<sub>2</sub>-citrate in CD34<sup>+</sup> CML and CD34<sup>+</sup> normal cells following 24 h incubation with <sup>13</sup>C<sub>6</sub>-labeled glucose. n=5 patient and normal samples. (g-i) Relative isotopologue distribution of (g) citrate, (h) glutamate and (i) aspartate in CD34<sup>+</sup>CD38<sup>-</sup> CML and CD34<sup>+</sup>CD38<sup>-</sup> normal cells measured by LC-MS following 24 h incubation with <sup>13</sup>C<sub>6</sub>-labeled glucose. n=1 patient sample. P-values were calculated by unpaired Student's t-test.

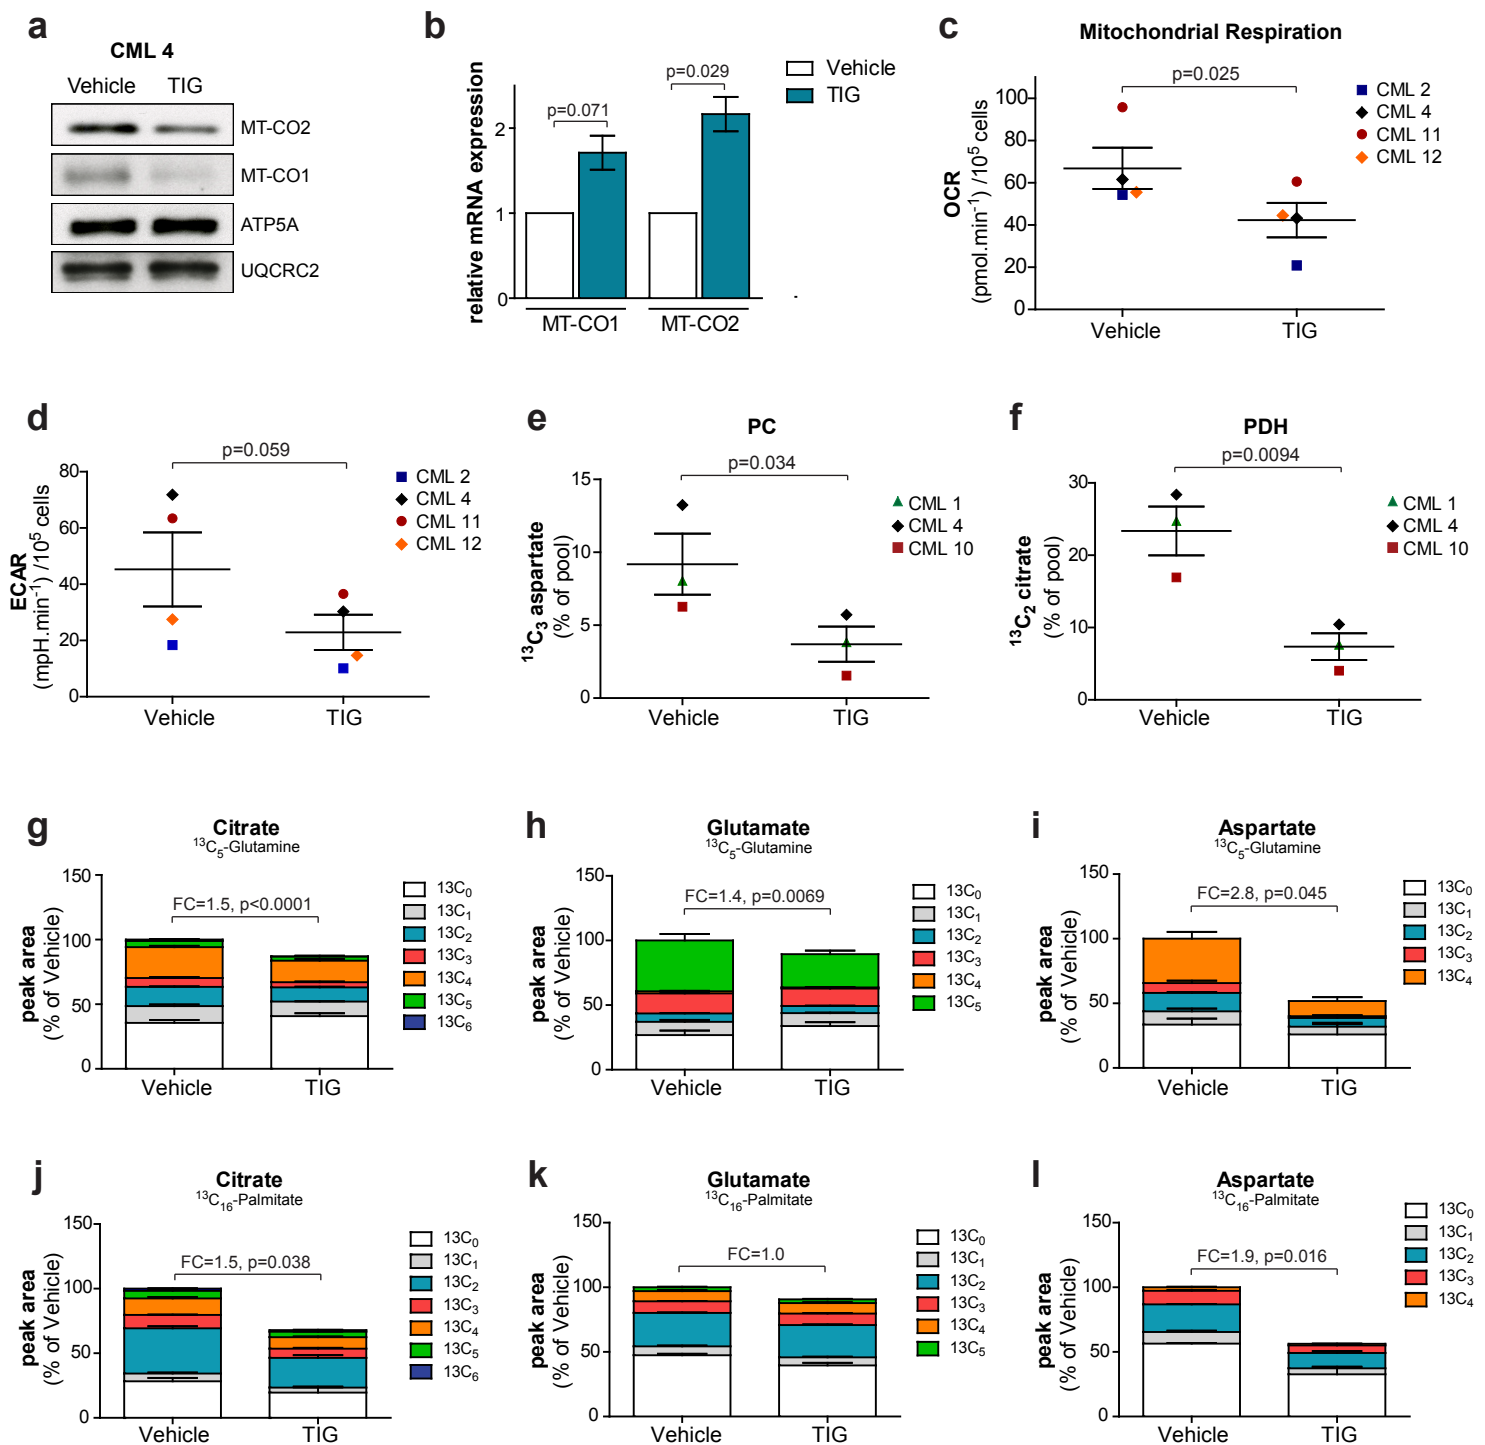

### Supplementary Figure 4: Tigecycline inhibits oxidative metabolism in CD34<sup>+</sup> CML cells.

(a) Protein expression in CD34<sup>+</sup> CML cells following 72 h *in vitro* treatment with tigecycline (2.5 μM). n=1 patient sample (b) mRNA levels following 72 h *in vitro* treatment with tigecycline (2.5 μM). n=3 patient samples. (c) Basal mitochondrial OCR in CD34<sup>+</sup> CML cells following treatment with tigecycline (2.5 μM). n=4 patient samples. (d) Basal Extracellular Acidification Rate (ECAR) in CD34<sup>+</sup> CML cells following treatment with tigecycline (2.5 μM). n=4 patient samples. (e-f) Relative abundance of (e) <sup>13</sup>C<sub>3</sub>-aspartate and (f) <sup>13</sup>C<sub>2</sub>-citrate in CD34<sup>+</sup> CML cells following 24 h incubation with <sup>13</sup>C<sub>6</sub>-labeled glucose in presence or absence of tigecycline (2.5 μM). n=3 patient samples. (g-i) Relative isotopologue distribution of (g) citrate, (h) glutamate and (i) aspartate in CD34<sup>+</sup> CML cells measured by LC-MS following 24 h incubation with <sup>13</sup>C<sub>5</sub>-labeled glutamine in presence or absence of tigecycline (2.5 μM). n=3 patient samples. (j-l) Relative isotopologue distribution of (j) citrate, (k) glutamate and (l) aspartate in CD34<sup>+</sup> CML cells measured by LC-MS following 24 h incubation with <sup>13</sup>C<sub>16</sub>-labeled palmitate in presence or absence of tigecycline (2.5 μM). n=3 patient samples. P-values were calculated by paired Student's t-test. All data are represented as Mean ± S.E.M.

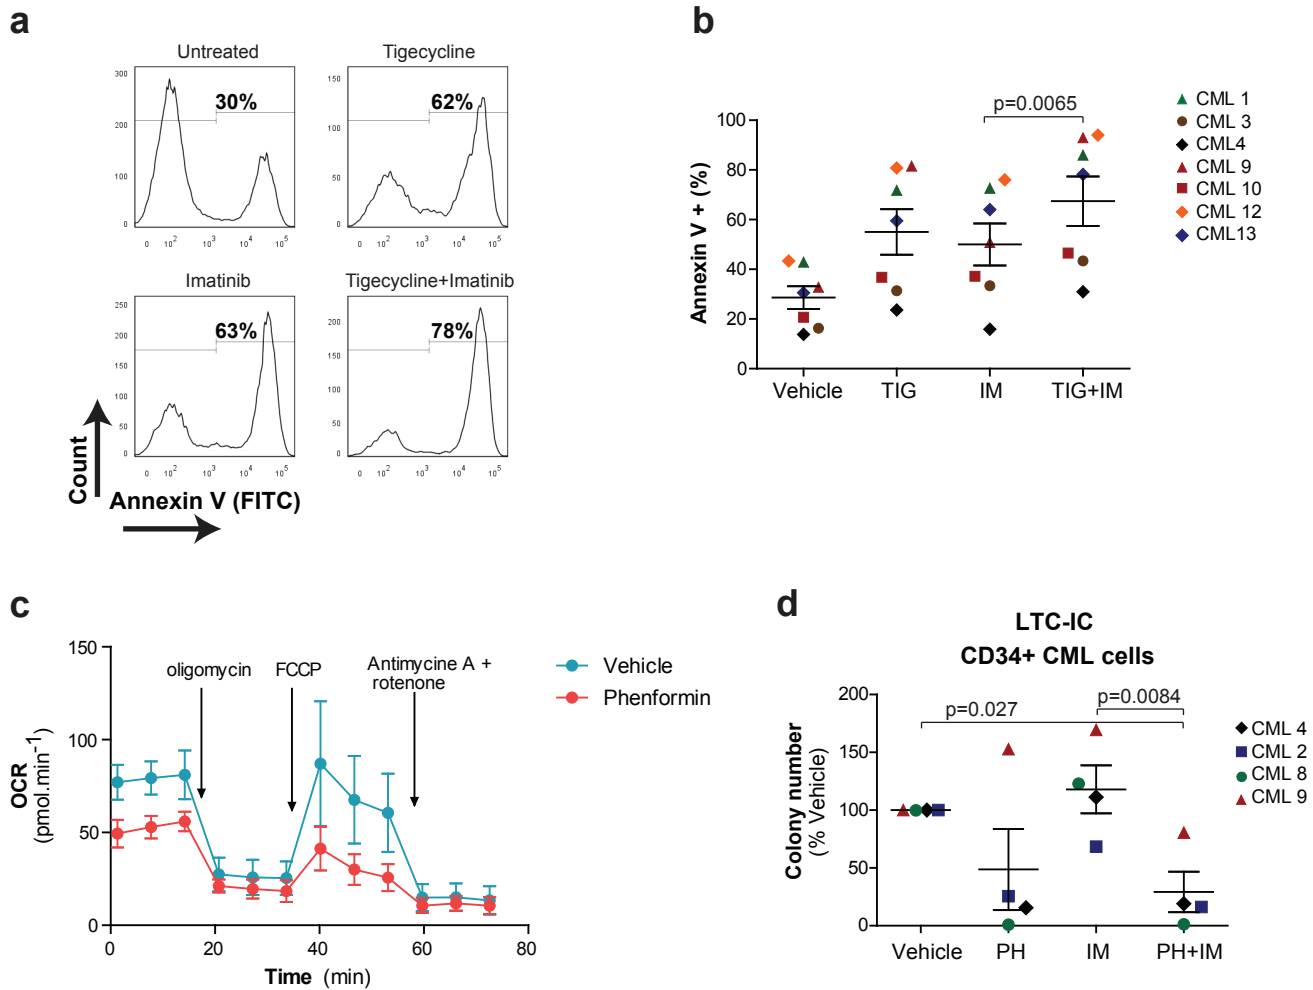

**Supplementary Figure 5: Inhibition of mitochondrial activity targets primitive CML cells.**

(a) Representative flow cytometry histograms and (b) percentage of Annexin V positive cells after 72 h treatment with tigecycline (2.5  $\mu$ M), imatinib (2  $\mu$ M) and combination (2.5  $\mu$ M + 2  $\mu$ M) in CD34<sup>+</sup> CML cells. Mean  $\pm$  S.E.M. n=7 patient samples. (c) Representative respirometry output in CD34<sup>+</sup> CML following 24 h treatment with phenformin (10  $\mu$ M). Mean  $\pm$  S.D. n=1 patient sample. (d) Number of colonies measured by LTC-IC assay in CD34<sup>+</sup> CML cells. Mean  $\pm$  S.E.M. n=4 patient samples. P-values were calculated by paired Student's t-test.

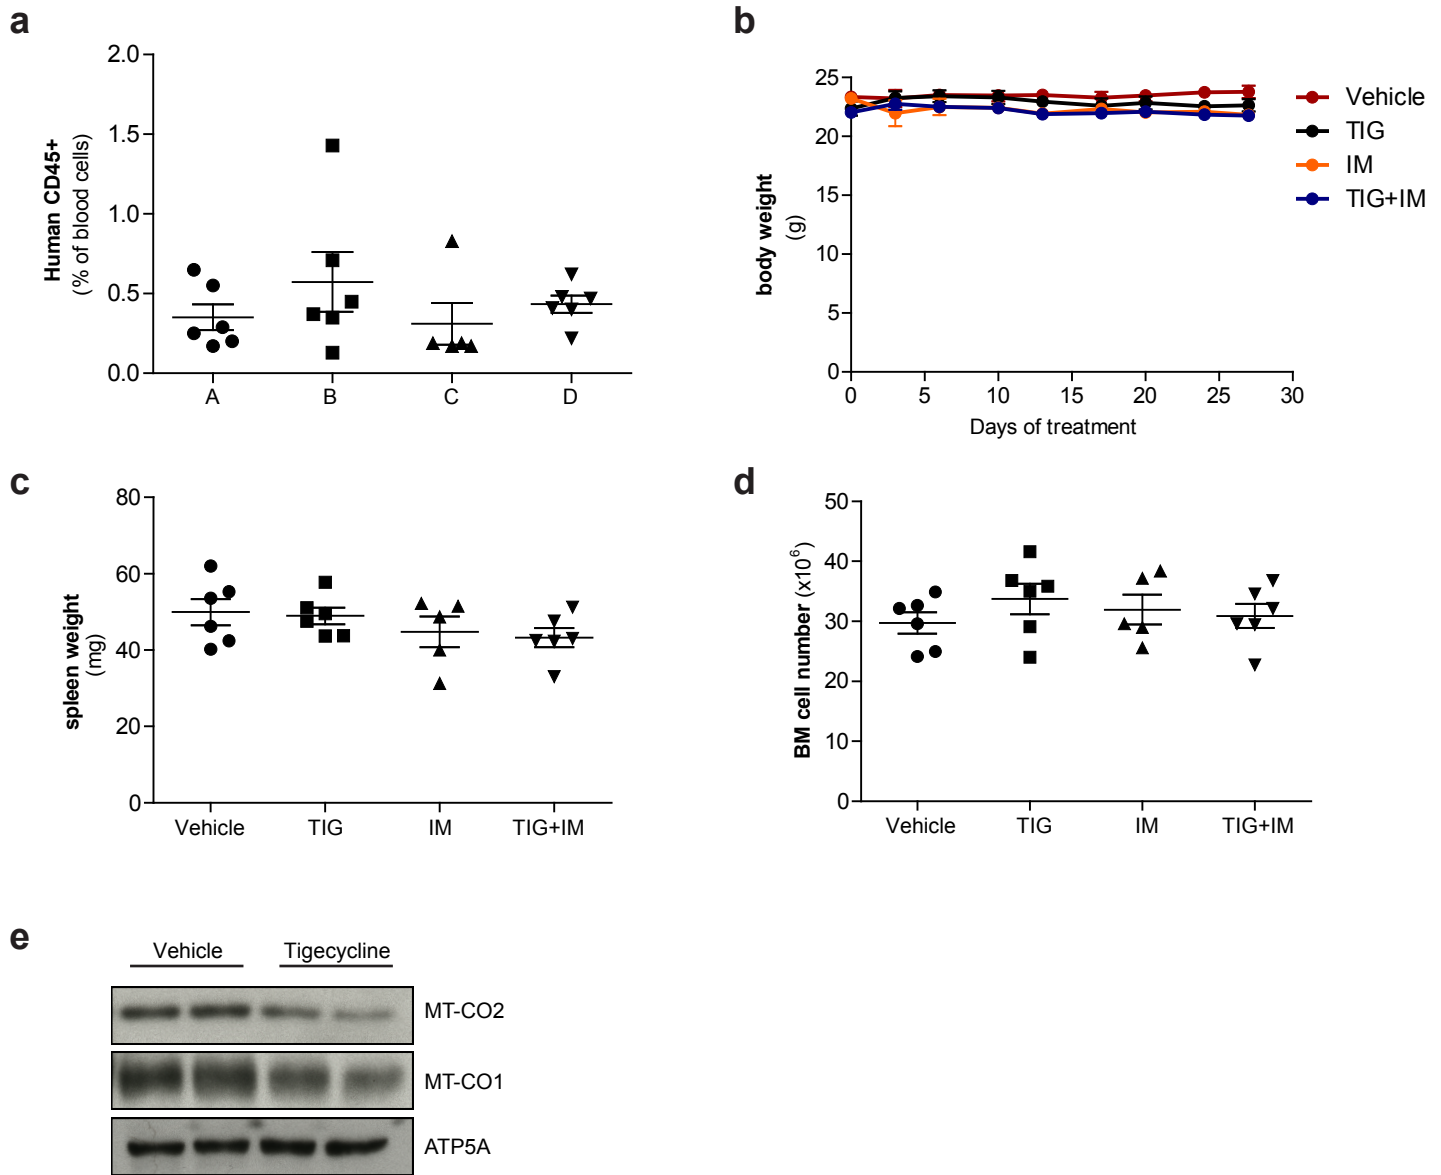

**Supplementary Figure 6: *In vivo* tigecycline and/or imatinib treatment is not toxic towards normal murine cells.**

(a) Percentage of human CD45<sup>+</sup> cells in the blood of immuno-compromised mice prior to drug treatment. Group A, B, C and D were later on treated with Vehicle, TIG, IM and TIG+IM respectively. (b) Change in mice body weights upon drug treatment. (c) Spleen weight and (d) bone marrow cellularity of mice engrafted with CD34<sup>+</sup> CML cells after 4 weeks of treatment with the indicated drugs. (e) Protein expression in FACS-sorted CD34<sup>+</sup> CML cells following 4 weeks *in vivo* drug treatment. Mean  $\pm$  S.E.M.

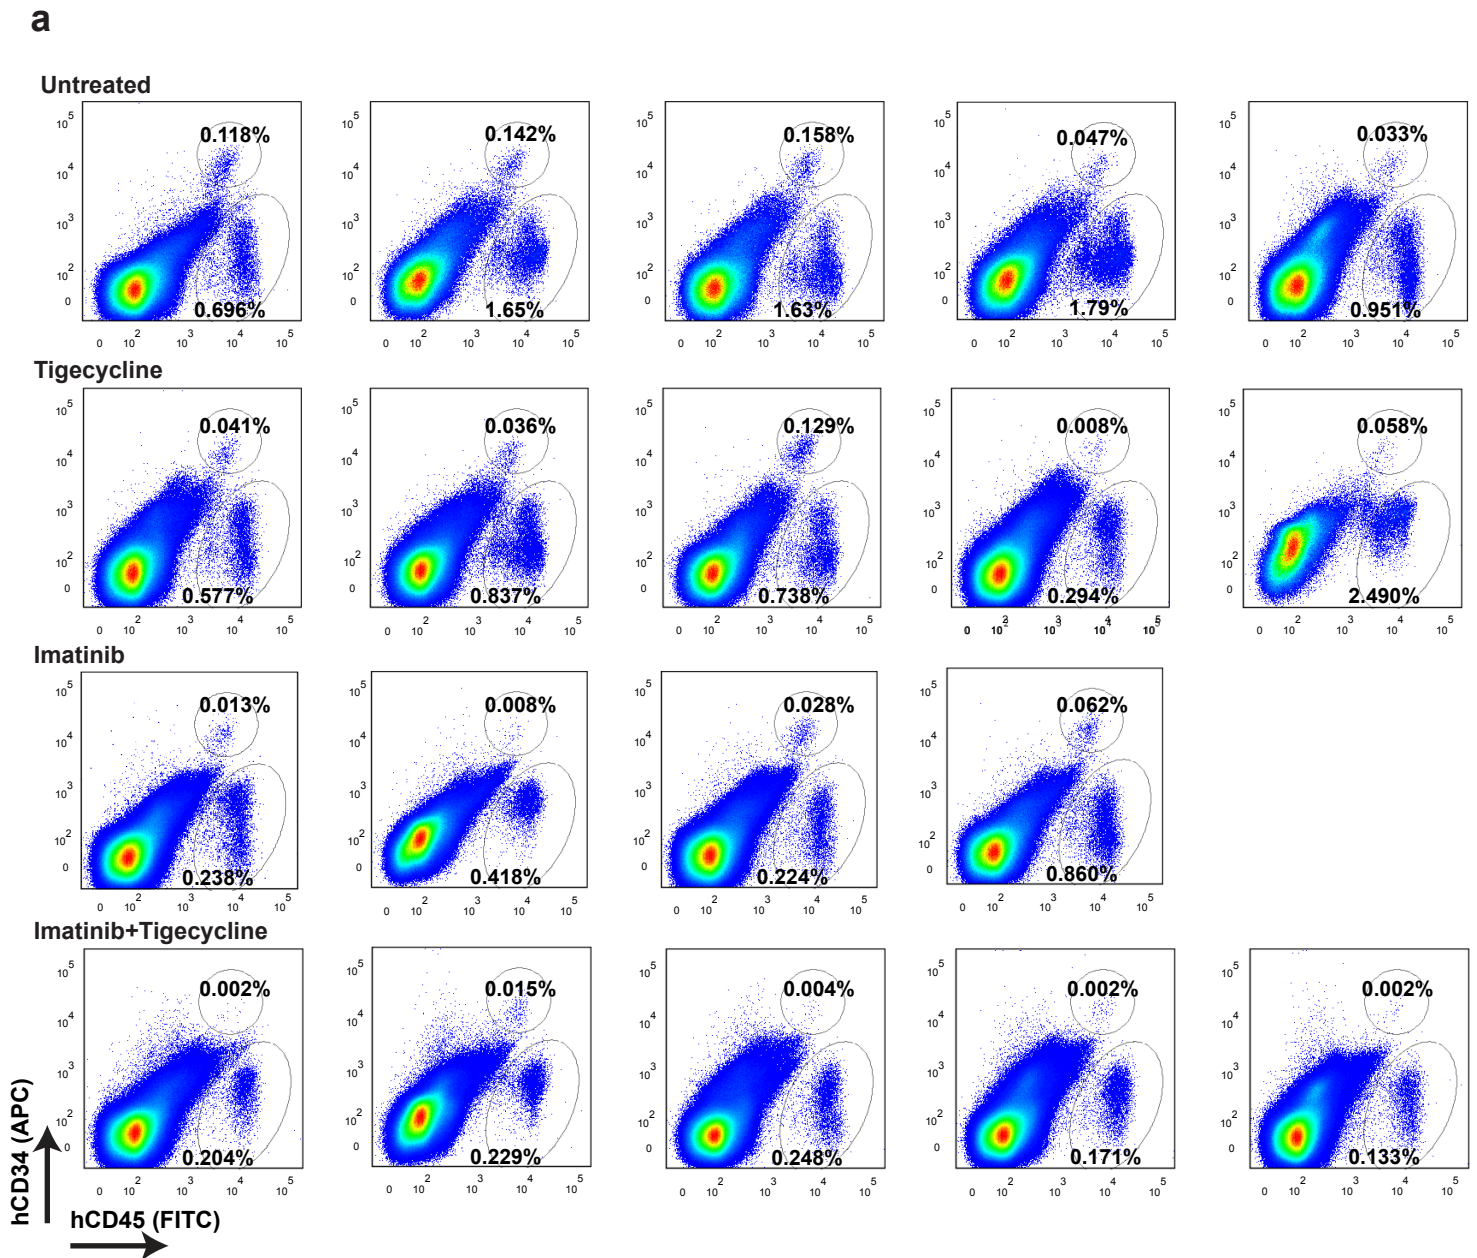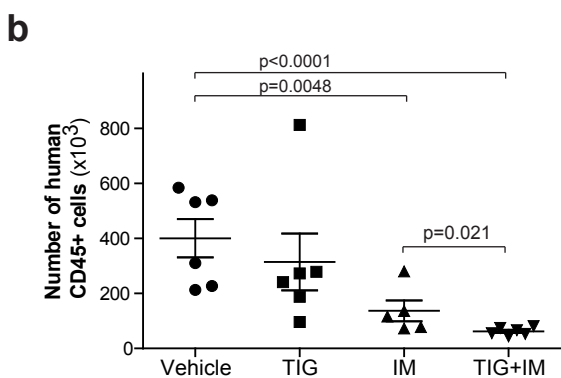

**Supplementary Figure 7: The combination of imatinib and tigecycline targets CML stem-cells *in vivo*.** Mice were transplanted with CD34<sup>+</sup> CML cells and analysis of human cell engraftment was performed following 4 weeks of drug treatment. **(a)** Percentage of human CD45<sup>+</sup> and human CD34<sup>+</sup> cells from total bone marrow cells. **(b)** Number of human CD45<sup>+</sup> cells engrafted in the bone marrow of immuno-compromised mice. Mean ± S.E.M. P-values were calculated by unpaired Student's t-test on logarithmically transformed variables to meet the assumption of normality.

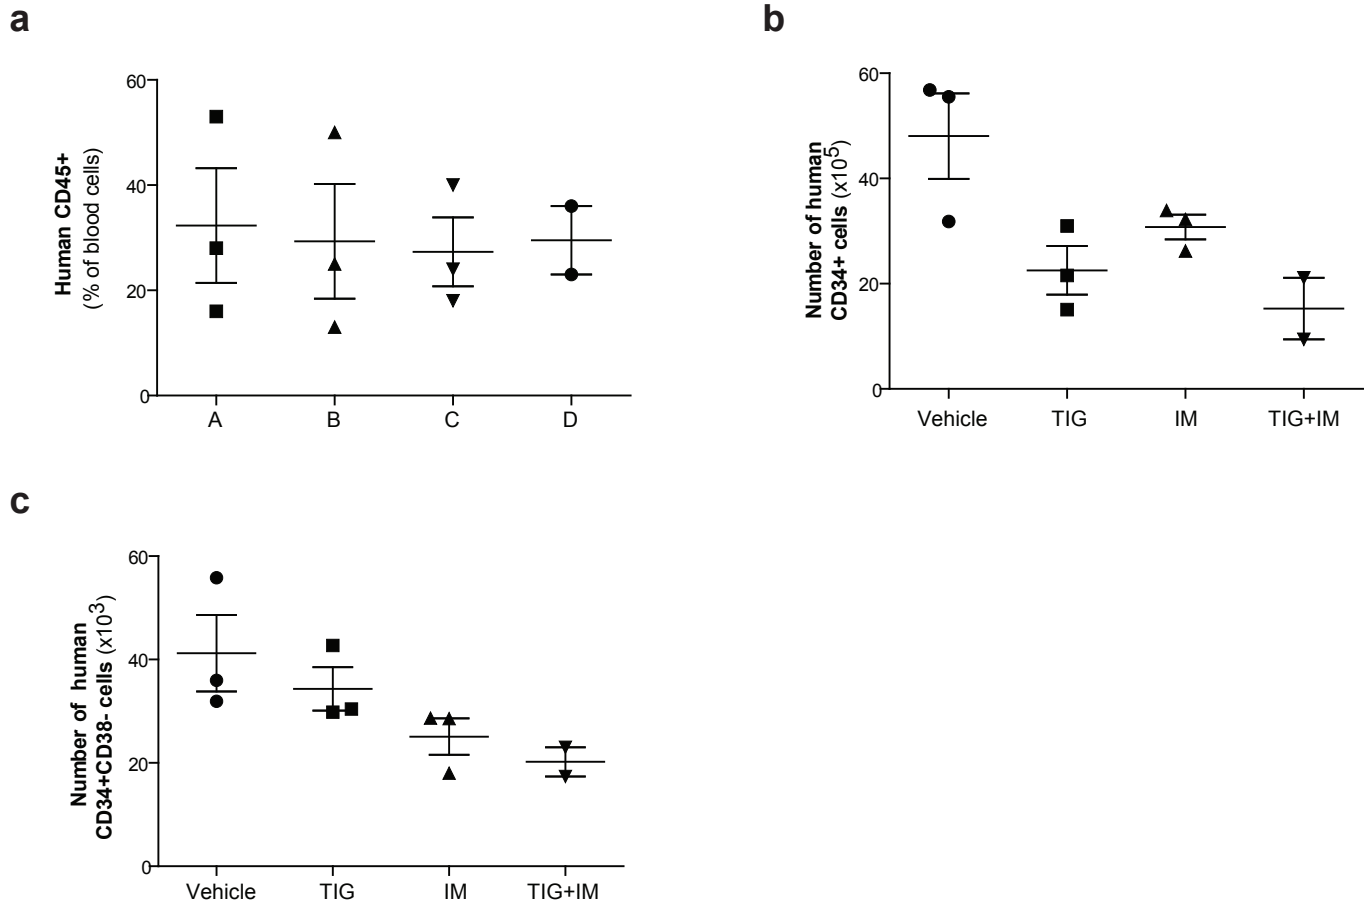

**Supplementary Figure 8: Tigecycline marginally affects normal HSCs *in vivo*.**

(a) The pre-treatment engraftment levels of cord blood cells in immuno-compromised mice were assessed by monitoring the percentage of human CD45<sup>+</sup> circulating leukocytes. Group A, B, C and D were later on treated with Vehicle, TIG, IM and TIG+IM respectively. (b-c) Number of (b) human CD34<sup>+</sup> and (c) human CD34<sup>+</sup>CD38<sup>-</sup> cord blood cells engrafted in the bone marrow following *in vivo* drug treatment. n<sub>≥</sub>2 mice per treatment arm. TIG, tigecycline; IM, imatinib.
